# Supplementary material
Source: Springer Nature journal article supplement (https://www.springermedizin.de/resource/supplementary/12888_2012_998_MOESM3_ESM.pdf/9479614)
Supplement: MOESM3 [file 9479614]

Introduction

Good things  
about usingBad things  
about using

Weighing it up

Good things  
about changeBad things  
about change

Weighing it up

Summary

What now?

## Weighing it all up – Changing your drug use

Now have a look at your list of positives and negatives about changing your drug use.

*How important are each of these reasons and negatives to you personally?*

*If '0' was 'not important at all' and '10' was 'very important' what number would you give them?*

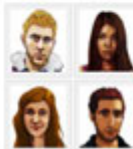

Use the sliders to rate how important each item is to you:

WHAT OTHER PEOPLE SAY

| Good things about change                | Importance (0-10) | Not so good things about change          | Importance (0-10) |
|-----------------------------------------|-------------------|------------------------------------------|-------------------|
| I would have more money                 | 9                 | It would be hard to cope with withdrawal | 7                 |
| I would feel healthier                  | 9                 | I would feel low all the time            | 5                 |
| I would be proud of myself              | 5                 |                                          |                   |
| I could get in control of my life again | 5                 |                                          |                   |

✓ SAVE MY RESPONSES

◀ BACK

NEXT ▶
